# Supplementary material for: A facile method to prepare SnO2 nanotubes for use in efficient SnO2–TiO2 core–shell dye-sensitized solar cells
Source: Royal Society of Chemistry journal article supplement (doi:10.1039/c2nr30349c), 2012-01-01
Supplement: c2nr30349c.pdf [file c2nr30349c.pdf]

**Supporting information:**

**A facile method to prepare SnO<sub>2</sub> nanotubes for use in  
efficient SnO<sub>2</sub>-TiO<sub>2</sub> core-shell dye-sensitized solar cells**

Caitian Gao, Xiaodong Li, Bingan Lu, Lulu Chen, Youqing Wang, Feng Teng,  
Jiangtao Wang, Zhenxing Zhang, Xiaojun Pan and Erqing Xie\*

*School of Physical Science and Technology, Lanzhou University, Lanzhou 730000,*

*Gansu, People's Republic of China*

E-mail: xieeq@lzu.edu.cn (E. Xie), caitiangao10@163.com (C. Gao)

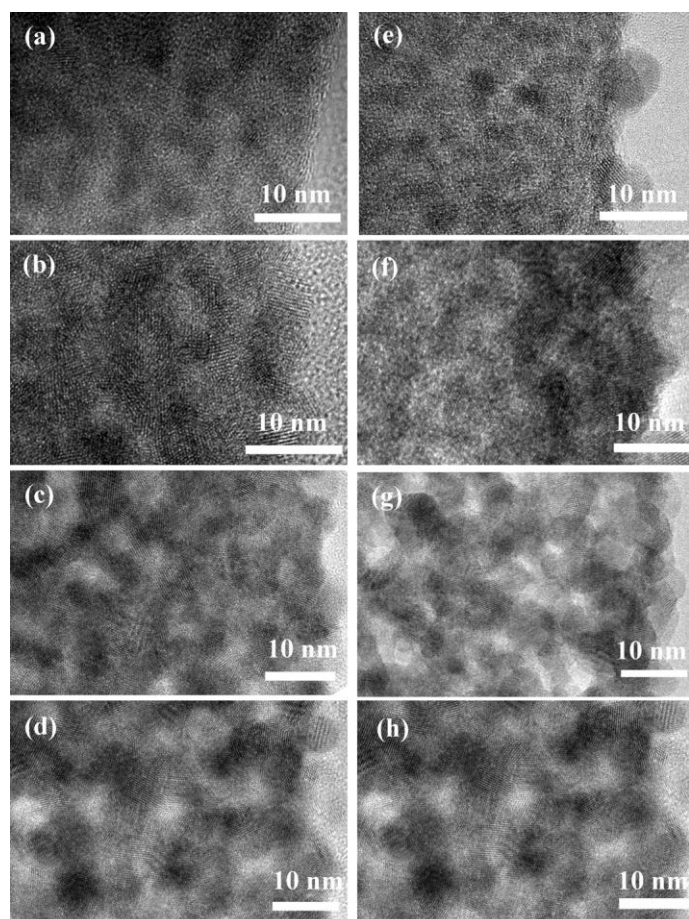

**Fig. S1** The high resolution transmission electron microscopy (HRTEM) images of the samples fabricated from solution A (a~d) and solution B (e~f) annealed at different temperatures (a and e) 300 °C ; (b and f) 350 °C ; (c and g) 425 °C ; (d and h) 450 °C.

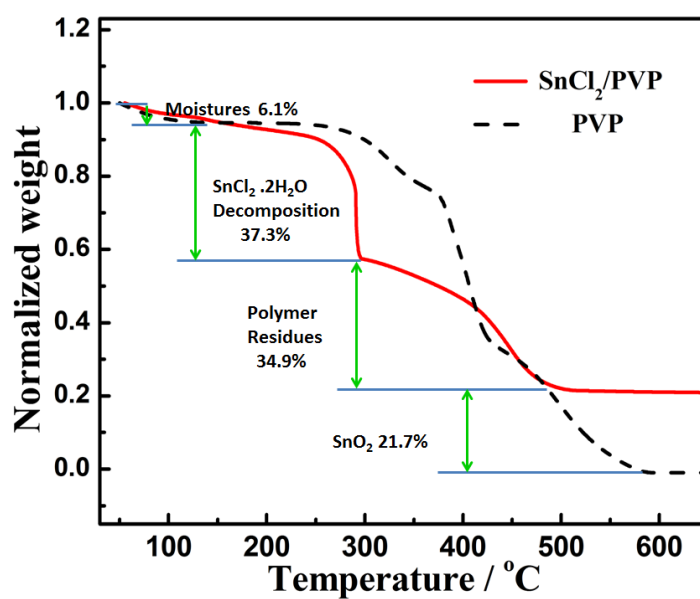

**Fig. S2** Thermogravimetric analysis (TGA) of PVP/SnCl<sub>2</sub>·2H<sub>2</sub>O composite nanofibers (red solid line) and pure PVP nanofibers (black dashed line).

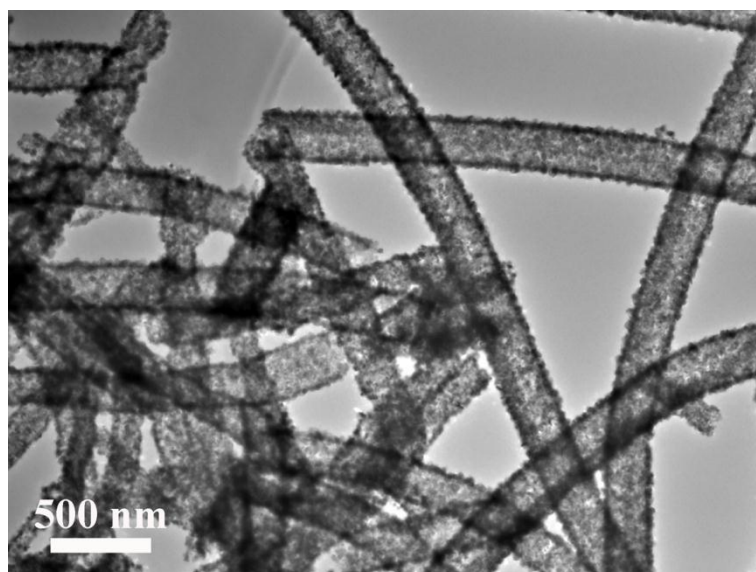

**Fig. S3** TEM image of the nanotubes prepared by electrospinning from solution A followed by sintering at 500 °C for 2 h with a higher heating rate of 10 °C min<sup>-1</sup>.
